# Supplementary material for: Targeted Resequencing of Otosclerosis Patients from Different Populations Replicates Results from a Previous Genome-Wide Association Study
Source: MDPI journal article supplement (doi:10.3390/jcm11236978), 2022-11-26
Supplement: s1 [file s1]

### Supplementary Table S1 Cases and controls included in this study

The table gives an overview of the number of cases and controls used in this study. Numbers are given for the total population and all subpopulations. For the total population mean age at time of collection was calculated and percentages of female and male participants are given.

|                                            |                      |
|--------------------------------------------|----------------------|
| <b>Total population (N cases/controls)</b> | <b>1696 /1584</b>    |
| <b>Mean age at collection (SD)</b>         | <b>47.69 (13.34)</b> |
| <b>Gender (% female/male)</b>              | <b>60.86/39.13</b>   |
| <b>Belgian (N cases/controls)</b>          | <b>796/854</b>       |
| <b>Dutch (N cases/controls)</b>            | <b>143/118</b>       |
| <b>French (N cases/controls)</b>           | <b>347/367</b>       |
| <b>Italian (N cases/controls)</b>          | <b>229/63</b>        |
| <b>Romanian (N cases/controls)</b>         | <b>87/89</b>         |
| <b>Swiss (N cases/controls)</b>            | <b>94/93</b>         |

### Supplemental Table S2 Result of Linkage Disequilibrium between variants

Linkage disequilibrium (LD) between variants was calculated using the Linkage Disequilibrium Calculator of Ensembl (EMBL-EBI, Hinxton, UK) using data from the 1000 Genomes Project database. Variants occurring in the same gene are used for calculations. Each line gives the  $r^2$  and  $D'$  between two variants.

| <b>Gene</b>      | <b>Variant 1</b> | <b>Variant 2</b> | <b><math>r^2</math></b> | <b><math>D'</math></b> |
|------------------|------------------|------------------|-------------------------|------------------------|
| <b>AHSG</b>      | rs4917           | rs4918           | 1.000000                | 1.000000               |
|                  | rs4918           | rs1071592        | 0.769229                | 0.999999               |
|                  | rs4917           | rs1071592        | 0.769229                | 0.999999               |
| <b>LINC01482</b> | rs3744501        | rs8070086        | 0.397106                | 0.717946               |
|                  | rs3744501        | rs2278445        | 0.111645                | 0.653026               |
|                  | rs3744501        | rs34216978       | 0.100347                | 0.999975               |
|                  | rs34216978       | rs11868207       | 0.057586                | 0.853398               |
|                  | rs2278445        | rs11868207       | 0.206276                | 0.999982               |
|                  | rs2278445        | rs8070086        | 0.201689                | 0.999976               |
|                  | rs34216978       | rs8070086        | 0.055878                | 0.850148               |

|              |            |            |          |          |
|--------------|------------|------------|----------|----------|
|              | rs11868207 | rs8070086  | 0.977773 | 1.000000 |
|              | rs3744501  | rs11868207 | 0.380730 | 0.695129 |
| <b>MARK3</b> | rs1951391  | rs2273699  | 0.978346 | 1.000000 |
|              | rs1951391  | rs13987    | 0.371420 | 0.999988 |
|              | rs11541718 | rs1951391  | 0.371420 | 0.999988 |
|              | rs2273699  | rs13987    | 0.363378 | 0.999990 |
|              | rs11541718 | rs13987    | 1.000000 | 1.000000 |
|              | rs11541718 | rs2273699  | 0.363378 | 0.999990 |
| <b>RELN</b>  | rs39335    | rs39374    | 0.094318 | 0.846650 |
|              | rs39335    | rs3914132  | 0.644475 | 0.955869 |
|              | rs39395    | rs7791481  | 0.182095 | 0.999987 |
|              | rs39352    | rs7791481  | 0.094847 | 0.999946 |
|              | rs2299383  | rs39335    | 0.280605 | 0.999986 |
|              | rs39374    | rs3914132  | 0.186535 | 0.999981 |
|              | rs39350    | rs7791481  | 0.064219 | 0.999899 |
|              | rs39335    | rs39352    | 0.093591 | 0.852162 |
|              | rs2299383  | rs39350    | 0.274041 | 0.938694 |
|              | rs39374    | rs39395    | 0.463093 | 0.933161 |
|              | rs2299383  | rs7791481  | 0.163365 | 0.889380 |
|              | rs39335    | rs39395    | 0.211247 | 0.924015 |
|              | rs39350    | rs39395    | 0.319325 | 0.951471 |
|              | rs39335    | rs39350    | 0.087260 | 0.999932 |
|              | rs39352    | rs39374    | 0.979503 | 1.000000 |
|              | rs39374    | rs7791481  | 0.096834 | 0.999958 |
|              | rs39352    | rs3914132  | 0.182706 | 0.999965 |

|           |           |          |          |
|-----------|-----------|----------|----------|
| rs39395   | rs3914132 | 0.350767 | 0.999996 |
| rs39350   | rs39352   | 0.677143 | 0.999999 |
| rs2299383 | rs39395   | 0.182891 | 0.455443 |
| rs39350   | rs3914132 | 0.123717 | 0.999960 |
| rs2299383 | rs3914132 | 0.285873 | 0.847692 |
| rs39350   | rs39374   | 0.663263 | 0.999998 |
| rs39352   | rs39395   | 0.486350 | 0.966260 |

### Supplemental Table S3 Result of gene-based tests

Gene-based tests were carried out under a wide range of models and assumptions, stratifying for variant type.

Gene-based tests included three mutation burden tests (Combined and Multivariate collapsing test (CMC),

kernel-based adaptive cluster (KBAC) test, and the Variable Thresholds method (VT)), and one variance

component analyses (cAlpha test). Variant type “All” represents all very rare variants with a minor allele

frequency (MAF) smaller than 0.01. All other variant types are the results of stratifying for variant. For each test

the uncorrected p-value is provided with the corresponding q-value after multiple testing between brackets.

| Gene        | Variant type                | Mutation burden tests |             |             | Variance component analysis |
|-------------|-----------------------------|-----------------------|-------------|-------------|-----------------------------|
|             |                             | CMC                   | KBAC        | VT          | cAlpha                      |
| <b>AHSG</b> | All                         | 0.64 (0.94)           | 0.33 (0.75) | 0.46 (0.79) | 0.69 (0.96)                 |
|             | Intronic                    | 1 (1)                 | 0.32 (0.75) | 0.31 (0.75) | 0.82 (0.99)                 |
|             | Exonic                      | 0.32 (0.75)           | 0.16 (0.59) | 0.19 (0.59) | 0.53 (0.85)                 |
|             | Non-synonymous & Frameshift | *                     | *           | *           | *                           |
|             | 3'-UTR                      | 0.15 (0.62)           | 1 (1)       | 1 (1)       | 0.60 (0.91)                 |
|             | 5'-UTR                      | 0.75 (0.96)           | 0.35 (0.75) | 0.44 (0.78) | 0.87 (1)                    |
|             |                             |                       |             |             |                             |
| <b>EYA2</b> | All                         | 0.61 (0.92)           | 0.18 (0.62) | 0.34 (0.75) | 0.53 (0.87)                 |

|                  |                             |                     |                      |                     |                      |
|------------------|-----------------------------|---------------------|----------------------|---------------------|----------------------|
|                  | Intronic                    | 1 (1)               | 0.49 (0.83)          | 0.40 (0.75)         | 0.83 (0.99)          |
|                  | Exonic                      | 0.28 (0.75)         | 0.052 (0.44)         | 0.095 (0.53)        | 0.53 (0.85)          |
|                  | Non-synonymous & Frameshift | <b>0.022</b> (0.31) | <b>0.004</b> (0.16)  | <b>0.027</b> (0.34) | 0.064 (0.48)         |
|                  | 3'-UTR                      | 0.11 (0.60)         | 0.97 (1)             | 0.98 (1)            | 0.18 (0.62)          |
|                  | 5'-UTR                      | *                   | *                    | *                   | *                    |
| <b>LINC01482</b> | All                         | <b>0.030</b> (0.34) | <b>0.0064</b> (0.16) | 0.061 (0.48)        | <b>0.0060</b> (0.16) |
|                  | Intronic                    | 0.18 (0.62)         | <b>0.034</b> (0.34)  | 0.31 (0.75)         | <b>0.015</b> (0.30)  |
|                  | Exonic                      | *                   | *                    | *                   | *                    |
|                  | Non-synonymous & Frameshift | *                   | *                    | *                   | *                    |
|                  | 3'-UTR                      | *                   | *                    | *                   | *                    |
|                  | 5'-UTR                      | *                   | *                    | *                   | *                    |
| <b>MARK3</b>     | All                         | 1 (1)               | 0.44 (0.78)          | 0.24 (0.70)         | 0.57 (0.88)          |
|                  | Intronic                    | 0.092 (0.56)        | 0.82 (0.99)          | 0.23 (0.70)         | 0.15 (0.62)          |
|                  | Exonic                      | 0.91 (1)            | 0.53 (0.85)          | 0.64 (0.92)         | 0.76 (0.94)          |
|                  | Non-synonymous & Frameshift | 1 (1)               | 0.53 (0.86)          | 0.73 (0.96)         | 0.39 (0.75)          |
|                  | 3'-UTR                      | 0.50 (0.83)         | 0.31 (0.75)          | 0.36 (0.75)         | 0.84 (0.99)          |
|                  | 5'-UTR                      | 0.15 (0.62)         | 0.067 (0.48)         | 0.088 (0.55)        | 0.38 (0.75)          |
| <b>RELN</b>      | All                         | 0.56 (0.88)         | 0.29 (0.75)          | 0.52 (0.84)         | 0.55 (0.87)          |
|                  | Intronic                    | 0.13 (0.61)         | 0.052 (0.45)         | <b>0.035</b> (0.34) | 0.066 (0.48)         |
|                  | Exonic                      | 0.96 (1)            | 0.56 (0.87)          | 0.84 (0.97)         | 0.66 (0.93)          |
|                  | Non-synonymous & Frameshift | 0.56 (0.88)         | 0.62 (0.93)          | 0.56 (0.88)         | 0.78 (0.97)          |
|                  | 3'-UTR                      | *                   | *                    | *                   | *                    |
|                  | 5'-UTR                      | 1 (1)               | 0.28 (0.75)          | 0.16 (0.62)         | 0.69 (0.96)          |
| <b>SUPT3H</b>    | All                         | 0.92 (1)            | 0.38 (0.74)          | 0.34 (0.74)         | 0.28 (0.74)          |

|              |                                |             |                     |                      |              |
|--------------|--------------------------------|-------------|---------------------|----------------------|--------------|
|              | Intronic                       | 0.73 (0.96) | 0.35 (0.75)         | 0.32 (0.75)          | 0.94 (1)     |
|              | Exonic                         | 0.10 (0.58) | <b>0.026</b> (0.32) | 0.18 (0.59)          | 0.089 (0.52) |
|              | Non-synonymous &<br>Frameshift | *           | *                   | *                    | *            |
|              | 3'-UTR                         | 0.19 (0.62) | 0.95 (1)            | 0.80 (0.97)          | 0.71 (0.96)  |
|              | 5'-UTR                         | 1 (1)       | 0.37 (0.75)         | 0.31 (0.75)          | 0.73 (0.96)  |
| <b>TGFβ1</b> | All                            | 0.37 (0.74) | 0.16 (0.59)         | 0.086 (0.52)         | 0.43 (0.77)  |
|              | Intronic                       | 1 (1)       | 0.57 (0.88)         | 0.76 (0.96)          | 0.76 (0.96)  |
|              | Exonic                         | 0.36 (0.74) | 0.088 (0.52)        | 0.20 (0.60)          | 0.38 (0.74)  |
|              | Non-synonymous &<br>Frameshift | 0.13 (0.60) | <b>0.020</b> (0.31) | <b>0.041</b> (0.39)  | 0.41 (0.76)  |
|              | 3'-UTR                         | 0.72 (0.96) | 0.69 (0.96)         | 0.66 (0.96)          | 0.78 (0.97)  |
|              | 5'-UTR                         | 0.39 (0.75) | 0.12 (0.60)         | <b>0.0064</b> (0.16) | 0.13 (0.61)  |

\* The number of variants was insufficient to carry out the gene-based tests
